# Supplementary material
Source: Springer Nature journal article supplement (https://www.springermedizin.de/resource/supplementary/13000_2009_255_MOESM1_ESM.pdf/9624170)

**A**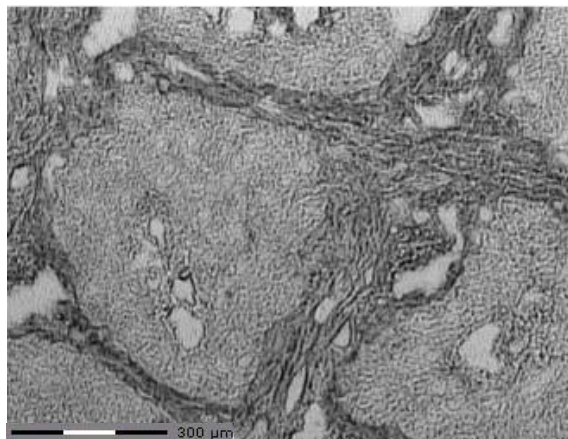**B**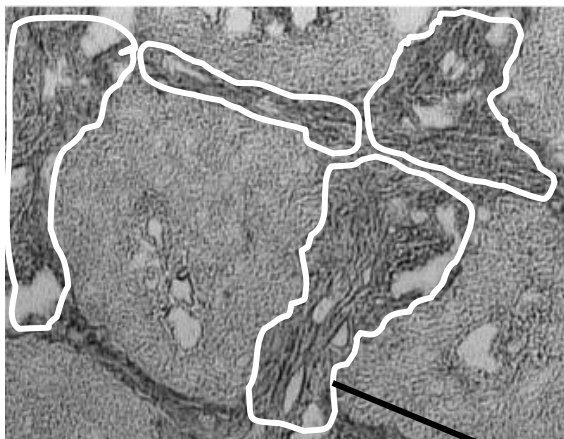**C**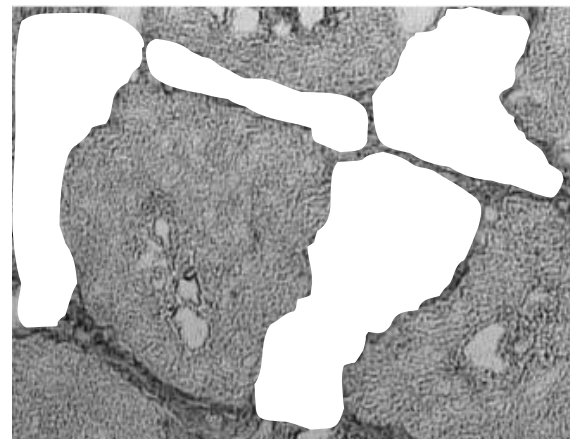**D**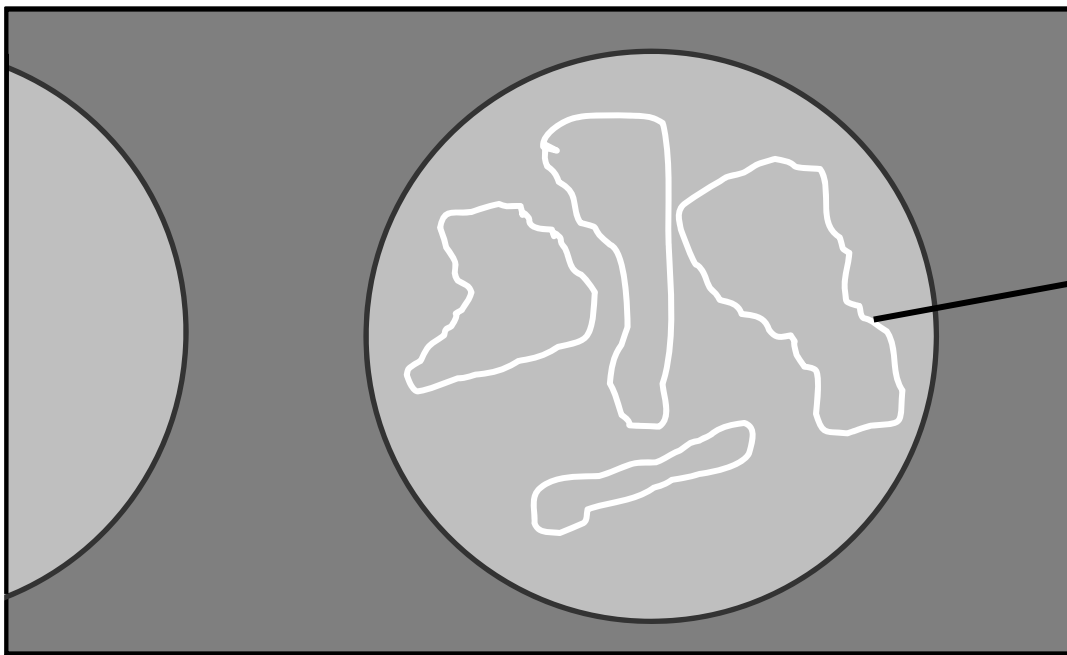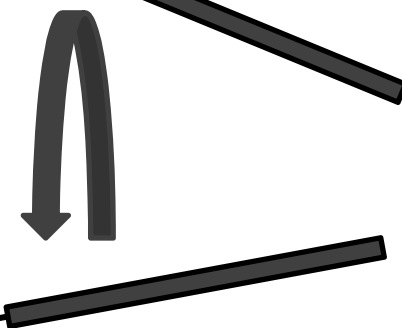

Supplement: MOESM1 [file 9624170]
